# Supplementary material for: Serum HE4 and diagnosis of ovarian cancer in postmenopausal women with adnexal masses
Source: PubMed Central journal article supplement (PMC7471839; doi:10.1016/j.ajog.2019.07.031), 2020-01
Supplement: mmc1.pdf [file mmc1.pdf]

**PELVIC ULTRASOUND SCAN RESULTS**

First Name \_\_\_\_\_ Surname \_\_\_\_\_ Volunteer Ref No \_\_\_\_\_

Date \_\_\_\_/\_\_\_\_/\_\_\_\_ Ultrasonographer \_\_\_\_\_

Please tick the relevant box

Mode of scan  TRANSABDOMINAL  TRANSVAGINAL  BOTH Latex allergy  YES  NO

Period in last year  YES  NO Date of last period (if within the last year) \_\_\_\_/\_\_\_\_/\_\_\_\_

Type of HRT if used  ESTROGEN  PROGESTOGEN  COMBINED CYCLICAL (CONVENTIONAL)  
 COMBINED CONTINUOUS (NO BLEED)  TIBOLONE  OTHER

Hysterectomy  Previous oophorectomy  NONE  LEFT OOPHORECTOMY  RIGHT OOPHORECTOMY

**DETAILS OF OVARIAN SCAN**

|                                                                                                                                                                                                                                      | LEFT OVARY / ADNEXA                                                                                                                                                                                                                                                                                        | RIGHT OVARY / ADNEXA                                                                                                                                                                         |
|--------------------------------------------------------------------------------------------------------------------------------------------------------------------------------------------------------------------------------------|------------------------------------------------------------------------------------------------------------------------------------------------------------------------------------------------------------------------------------------------------------------------------------------------------------|----------------------------------------------------------------------------------------------------------------------------------------------------------------------------------------------|
| <b>VISUALISATION</b><br><b>MUST BE COMPLETED</b>                                                                                                                                                                                     | <input type="checkbox"/> SEEN<br><input type="checkbox"/> NOT SEEN / GOOD VIEW<br><input type="checkbox"/> NOT SEEN / POOR VIEW<br><input type="checkbox"/> NOT SEEN / PREVIOUS OOPHERECTOMY                                                                                                               | <input type="checkbox"/> SEEN<br><input type="checkbox"/> NOT SEEN / GOOD VIEW<br><input type="checkbox"/> NOT SEEN / POOR VIEW<br><input type="checkbox"/> NOT SEEN / PREVIOUS OOPHERECTOMY |
| <b>If ovary not seen, reason</b>                                                                                                                                                                                                     | <input type="checkbox"/> BOWEL <input type="checkbox"/> FIBROIDS<br><input type="checkbox"/> PELVIC VARICOSITIES<br><input type="checkbox"/> OTHER                                                                                                                                                         | <input type="checkbox"/> BOWEL <input type="checkbox"/> FIBROIDS<br><input type="checkbox"/> PELVIC VARICOSITIES<br><input type="checkbox"/> OTHER                                           |
| <b>OVARIAN DIMENSIONS</b>                                                                                                                                                                                                            | mm    mm    mm                                                                                                                                                                                                                                                                                             | mm    mm    mm                                                                                                                                                                               |
| <b>Morphology</b><br><b>MUST BE COMPLETED</b><br><b>IF OVARY SEEN</b><br>(If COMPLEX please write description of findings in abnormalities notes box & complete other side of this form. Also enter reference number at top of page) | <input type="checkbox"/> NORMAL<br><input type="checkbox"/> SIMPLE CYST<br><input type="checkbox"/> COMPLEX MORPHOLOGY                                                                                                                                                                                     | <input type="checkbox"/> NORMAL<br><input type="checkbox"/> SIMPLE CYST<br><input type="checkbox"/> COMPLEX MORPHOLOGY                                                                       |
|                                                                                                                                                                                                                                      | <b>If midline mass, please enter under left or right adnexa and describe below</b><br><b>If longstanding UNCHANGED complex morphology which has been previously investigated on UKCTOCS screening and is being managed conservatively, please fax form to Susan Davies on 0207 380 6929 for data entry</b> |                                                                                                                                                                                              |
| <b>Number of Cysts</b><br>(more than 1 cyst = complex morphology)                                                                                                                                                                    |                                                                                                                                                                                                                                                                                                            |                                                                                                                                                                                              |
| <b>Ovary mobile?</b>                                                                                                                                                                                                                 | <input type="checkbox"/> YES <input type="checkbox"/> NO                                                                                                                                                                                                                                                   | <input type="checkbox"/> YES <input type="checkbox"/> NO                                                                                                                                     |

Max double endometrial thickness \_\_\_\_\_ mms Fluid POD or ascites (max vertical diameter) \_\_\_\_\_ mms

Details of abnormalities: \_\_\_\_\_ Referred in view of incidental findings  YES  NO

Type of Image Record  NONE  DISK  PHOTO ONLY  BOTH DISK AND PHOTO

**\*Result Classification /Recommended Action Must Be Completed At Time Of Scan**

NORMAL hence ROUTINE SCREENING  UNSATISFACTORY hence REPEAT LEVEL 1 SCAN  
 ABNORMAL therefore LEVEL 2 / SURGERY (If any other option required, contact Susan Davies on 0207 380 6913)

- As defined by protocol.

Entered \_\_\_\_\_ Signature \_\_\_\_\_ Date \_\_\_\_\_

Checked \_\_\_\_\_ Signature \_\_\_\_\_ Date \_\_\_\_\_

Signature \_\_\_\_\_

Date \_\_\_\_\_

**DETAILS OF ANY OVARIAN / ADNEXAL LESION DETECTED**

**VOLUNTEER REF (Please enter)** \_\_\_\_\_

|                                                                                                                             | LEFT OVARY/ADNEXA                             |                                                                                     |                                                 | RIGHT OVARY/ADNEXA                            |                                                                                       |                                                 |
|-----------------------------------------------------------------------------------------------------------------------------|-----------------------------------------------|-------------------------------------------------------------------------------------|-------------------------------------------------|-----------------------------------------------|---------------------------------------------------------------------------------------|-------------------------------------------------|
| <b>Cyst dimensions</b>                                                                                                      | mm                                            | mm                                                                                  | mm                                              | mm                                            | mm                                                                                    | mm                                              |
| <b>Cyst wall thickness</b>                                                                                                  | mm                                            |                                                                                     |                                                 | mm                                            |                                                                                       |                                                 |
| <b>Cyst wall structure</b>                                                                                                  | <input type="checkbox"/> SMOOTH               | <input type="checkbox"/> IRREGULAR                                                  |                                                 | <input type="checkbox"/> SMOOTH               | <input type="checkbox"/> IRREGULAR                                                    |                                                 |
| <b>Fluid in cyst</b>                                                                                                        | <input type="checkbox"/> ANECHOIC             | <input type="checkbox"/> RANDOM ECHOGENICITY                                        |                                                 | <input type="checkbox"/> ANECHOIC             | <input type="checkbox"/> RANDOM ECHOGENICITY                                          |                                                 |
|                                                                                                                             | <input type="checkbox"/> UNIFORM ECHOGENICITY |                                                                                     |                                                 | <input type="checkbox"/> UNIFORM ECHOGENICITY |                                                                                       |                                                 |
| <b>Cyst structures</b>                                                                                                      | <input type="checkbox"/> SEPTAE               | <input type="checkbox"/> PAPILLATIONS                                               |                                                 | <input type="checkbox"/> SEPTAE               | <input type="checkbox"/> PAPILLATIONS                                                 |                                                 |
| <b>Maximum septa thickness</b>                                                                                              | mm                                            |                                                                                     |                                                 | mm                                            |                                                                                       |                                                 |
| <b>Size of largest papillation</b>                                                                                          | mm                                            |                                                                                     |                                                 | mm                                            |                                                                                       |                                                 |
| <b>Solid areas</b>                                                                                                          | <input type="checkbox"/> Yes                  | <input type="checkbox"/> No                                                         |                                                 | <input type="checkbox"/> Yes                  | <input type="checkbox"/> No                                                           |                                                 |
| <b>Overall impression of lesion</b><br><small>(Classification using International Ovarian Tumour Analysis criteria)</small> | <input type="checkbox"/>                      |    | <input type="text" value="Unilocular cvst"/>    | <input type="checkbox"/>                      |    | <input type="text" value="Unilocular cvst"/>    |
|                                                                                                                             | <input type="checkbox"/>                      |    | <input type="text" value="Unilocular solid"/>   | <input type="checkbox"/>                      |    | <input type="text" value="Unilocular solid"/>   |
|                                                                                                                             | <input type="checkbox"/>                      |    | <input type="text" value="Multilocular cvst"/>  | <input type="checkbox"/>                      |    | <input type="text" value="Multilocular cvst"/>  |
|                                                                                                                             | <input type="checkbox"/>                      |   | <input type="text" value="Multilocular solid"/> | <input type="checkbox"/>                      |   | <input type="text" value="Multilocular solid"/> |
|                                                                                                                             | <input type="checkbox"/>                      |  | <input type="text" value="Solid"/>              | <input type="checkbox"/>                      |  | <input type="text" value="Solid"/>              |

**MUST BE COMPLETED IN THE PRESENCE OF AN OVARIAN LESION**

**DOPPLER STUDY OF ABNORMAL AREA**

|                                  |                                                                                                                                                                              |
|----------------------------------|------------------------------------------------------------------------------------------------------------------------------------------------------------------------------|
| <b>Doppler performed</b>         | <input type="checkbox"/> YES <input type="checkbox"/> NO                                                                                                                     |
| <b>Presence of colour signal</b> | <input type="checkbox"/> YES <input type="checkbox"/> NO                                                                                                                     |
| <b>Location of colour signal</b> | <input type="checkbox"/> SEPTAE <input type="checkbox"/> WALL<br><input type="checkbox"/> SOLID AREA <input type="checkbox"/> PAPILLATIONS<br><input type="checkbox"/> OTHER |
| <b>Lowest RI measured</b>        |                                                                                                                                                                              |
| <b>Lowest PI measured</b>        |                                                                                                                                                                              |
| <b>Peak systolic velocity</b>    |                                                                                                                                                                              |

**Findings suggestive of**  DERMOID CYST  ENDOMETRIOTIC CYST

**Were scan images reviewed at CC?**  YES  NO

**Person at CC with whom results discussed** \_\_\_\_\_

**Suggested management**  AS RECOMMENDED  OTHER (if other, please enter details in notes)

**NOTES**
